# Supplementary material for: Pleural mesothelioma and lung cancer risks in relation to occupational history and asbestos lung burden
Source: PubMed Central journal article supplement (PMC4853597; doi:10.1136/oemed-2015-103074), 2015-12-29
Supplement: oemed-2015-103074-s1.pdf [file oemed-2015-103074-s1.pdf]

**Supplementary Table 4.** Amosite and crocidolite TEM asbestos lung burdens in male and female mesothelioma and lung cancer patients and male odds ratios. The 12 mesotheliomas in women born 1925-39 are included and are also shown in brackets.

| Amosite lung burden (million fibres/gm) |              | Crocidolite lung burden (million fibres/gm) |        |             |   |             |       |          |   |             |   |             |   |             |         |
|-----------------------------------------|--------------|---------------------------------------------|--------|-------------|---|-------------|-------|----------|---|-------------|---|-------------|---|-------------|---------|
|                                         |              | 0-0.024                                     |        | 0.025-0.049 |   | 0.05-0.19   |       | 0.2-0.49 |   | 0.5-0.99    |   | ≥1.0        |   | Total       |         |
|                                         |              | M                                           | F      | M           | F | M           | F     | M        | F | M           | F | M           | F | M           | F       |
| 0-0.024                                 | Mesothelioma | 21                                          | 14 (6) | 0           | 0 | 2           | 2     | 1        |   |             |   |             |   | 24          | 16(6)   |
|                                         | Lung cancer  | 125                                         | 67     | 1           | 1 | 2           | 0     | 0        |   |             |   |             |   | 128         | 68      |
| <b>Male OR</b>                          |              | <b>1.0 (ref)</b>                            |        | <b>0.0</b>  |   | <b>6.0</b>  |       | $\infty$ |   |             |   |             |   | <b>1.1</b>  |         |
| 0.025-0.049                             | Mesothelioma | 9                                           | 2 (2)  | 0           |   | 0           |       |          | 1 | 0           |   |             |   | 9           | 3(2)    |
|                                         | Lung cancer  | 14                                          | 6      | 2           |   | 1           |       |          | 0 | 1           |   |             |   | 18          | 6       |
| <b>Male OR</b>                          |              | <b>3.8</b>                                  |        | <b>0.0</b>  |   | <b>0.0</b>  |       |          |   | <b>0.0</b>  |   |             |   | <b>3.0</b>  |         |
| 0.05-0.19                               | Mesothelioma | 26                                          | 3 (2)  | 2           |   | 4           | 2     | 3        |   | 2           |   | 1           |   | 38          | 5(2)    |
|                                         | Lung cancer  | 22                                          | 5      | 1           |   | 0           | 1     | 0        |   | 0           |   | 0           |   | 23          | 6       |
| <b>Male OR</b>                          |              | <b>7.0</b>                                  |        | <b>11.9</b> |   | $\infty$    |       | $\infty$ |   | $\infty$    |   | $\infty$    |   | <b>9.8</b>  |         |
| 0.2-0.49                                | Mesothelioma | 9                                           | 2 (1)  | 3           |   | 3           | 1 (1) | 1        |   |             |   |             |   | 16          | 3(2)    |
|                                         | Lung cancer  | 6                                           | 0      | 2           |   | 0           | 0     | 0        |   |             |   |             |   | 8           | 0       |
| <b>Male OR</b>                          |              | <b>8.9</b>                                  |        | <b>8.9</b>  |   | $\infty$    |       | $\infty$ |   |             |   |             |   | <b>11.9</b> |         |
| 0.5-0.99                                | Mesothelioma | 7                                           |        | 2           |   | 2           |       |          |   |             |   | 1           |   | 12          | 0       |
|                                         | Lung cancer  | 1                                           |        | 0           |   | 2           |       |          |   |             |   | 0           |   | 3           | 0       |
| <b>Male OR</b>                          |              | <b>41.7</b>                                 |        |             |   | <b>6.0</b>  |       |          |   |             |   | $\infty$    |   | <b>23.8</b> |         |
| ≥1.0                                    | Mesothelioma | 3                                           |        | 1           |   | 2           |       | 2        |   |             |   | 0           |   | 8           | 0       |
|                                         | Lung cancer  | 0                                           |        | 0           |   | 1           |       | 0        |   |             |   | 1           |   | 2           | 0       |
| <b>Male OR</b>                          |              | $\infty$                                    |        | $\infty$    |   | <b>11.9</b> |       | $\infty$ |   |             |   | <b>0.0</b>  |   | <b>23.8</b> |         |
| Total                                   | Mesothelioma | 75                                          | 21(11) | 8           | 0 | 13          | 5 (1) | 7        | 1 | 2           | 0 | 2           | 0 | 107         | 27 (12) |
|                                         | Lung cancer  | 168                                         | 78     | 6           | 1 | 6           | 1     | 0        | 0 | 1           | 0 | 1           | 0 | 182         | 80      |
| <b>Male OR</b>                          |              | <b>2.7</b>                                  |        | <b>7.9</b>  |   | <b>12.9</b> |       | $\infty$ |   | <b>11.9</b> |   | <b>11.9</b> |   |             |         |
